# Supplementary material for: An environment-friendly approach to produce nanostructured germanium anodes for lithium-ion batteries
Source: Royal Society of Chemistry journal article supplement (doi:10.1039/c9gc02348h), 2019-10-22
Supplement: c9gc02348h1.pdf [file c9gc02348h1.pdf]

## Supporting Information

### An Environment-Friendly Approach to Produce Nanostructured Germanium Anodes for Lithium-Ion Batteries

Evgeniya A. Saverina, Visweshwar Sivasankaran, Roman R. Kapaev, Alexey S. Galushko, Valentine P. Ananikov, Mikhail P. Egorov, Viatcheslav V. Jouikov, Pavel A. Troshin, Mikhail A. Syroeshkin

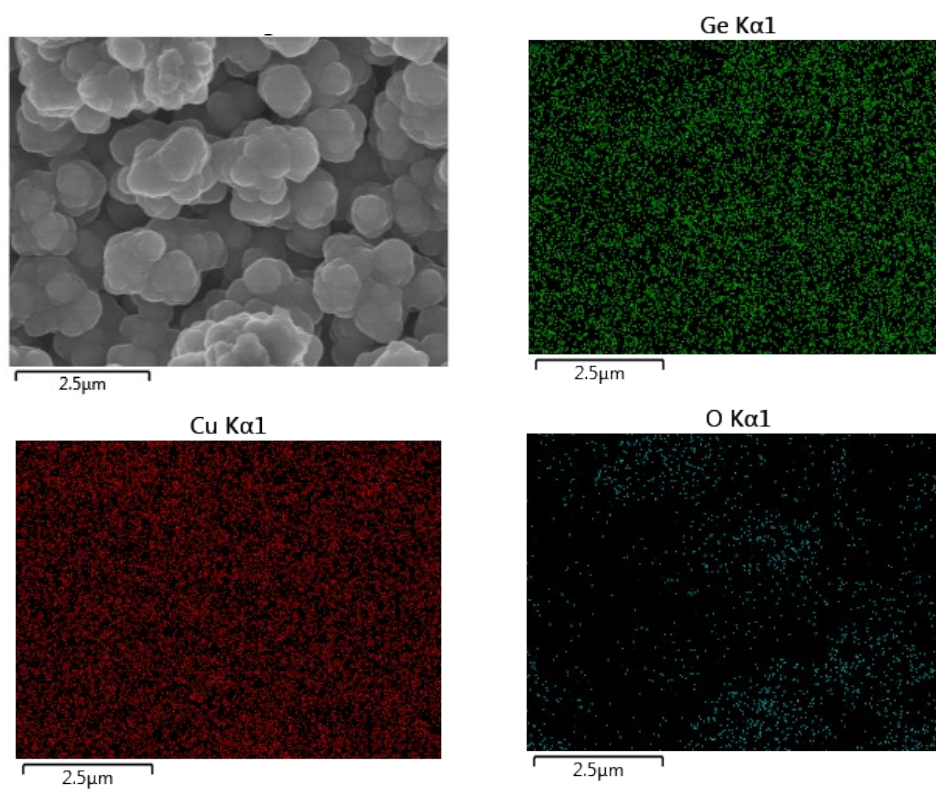

**Fig. S1.** A SEM image and an EDS elemental mapping of electrodeposited germanium coating on copper foil.

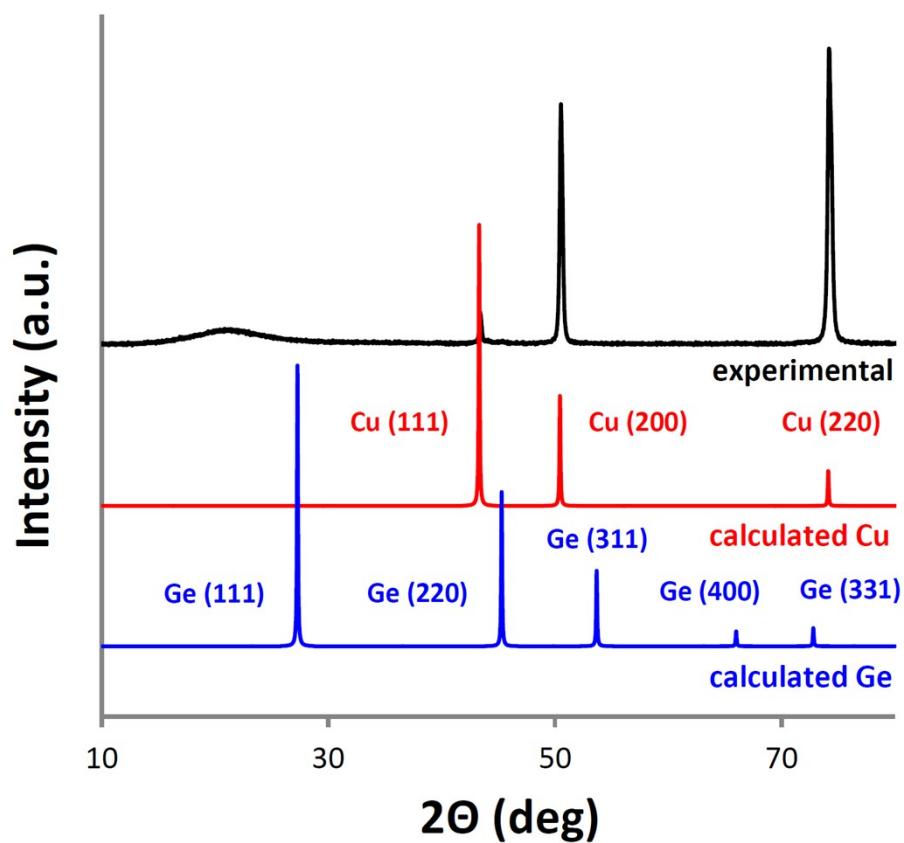

**Fig. S2.** XRD pattern of electrodeposited germanium coating on copper foil in comparison with calculated diffractograms of Ge and Cu.

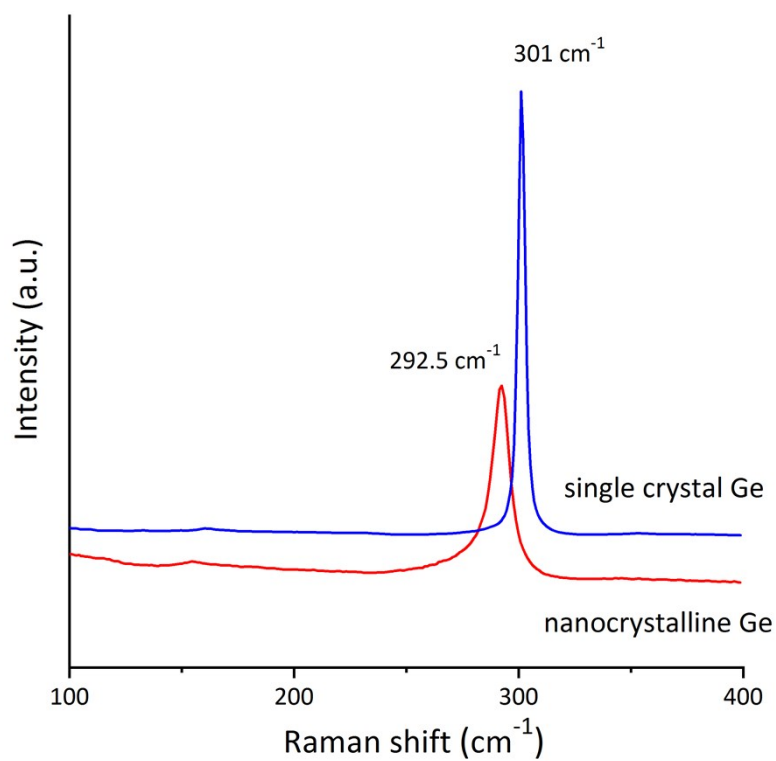

**Fig. S3.** Raman spectra of electrodeposited germanium in comparison with single crystal Ge (He-Ne laser, 632.8 nm, power 1.25 mW).

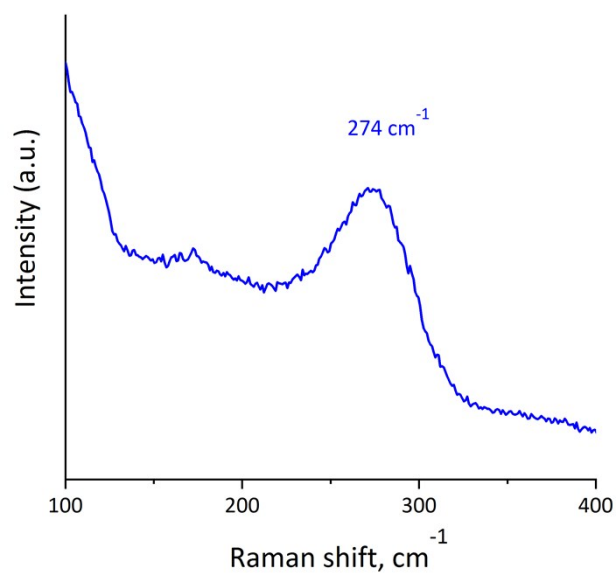

**Fig. S4.** Raman spectra of electrodeposited germanium after 5 cycles of CV (Fig. 4 of main article text)

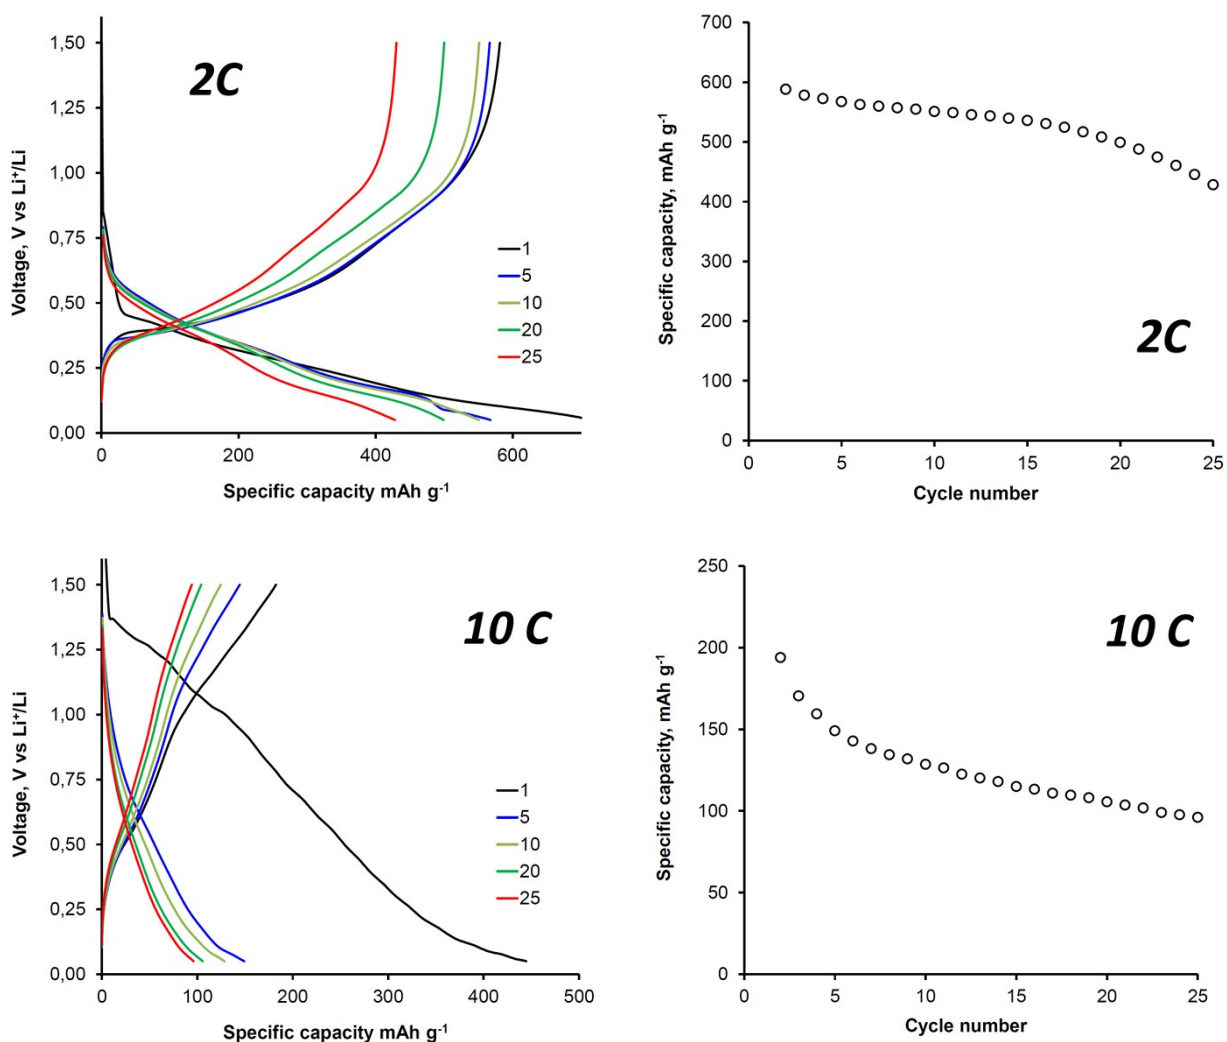

**Fig. S5.** Evolution of the cell capacity while cycling the Ge/Li half cells (a) and the corresponding charge-discharge characteristics (b) at 2C and 10C current rates.

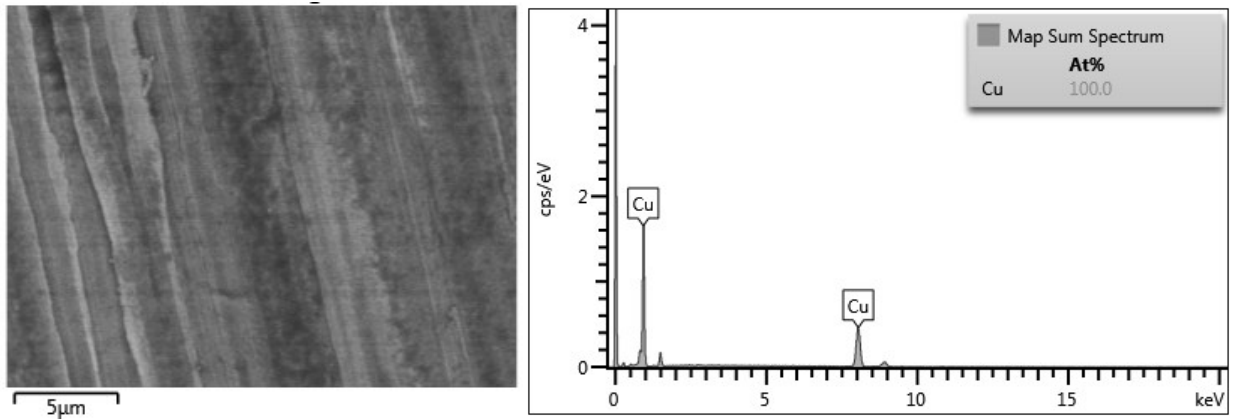

**Fig. S6.** Microphotograph and EDS analysis data for copper surface before electrodeposition.

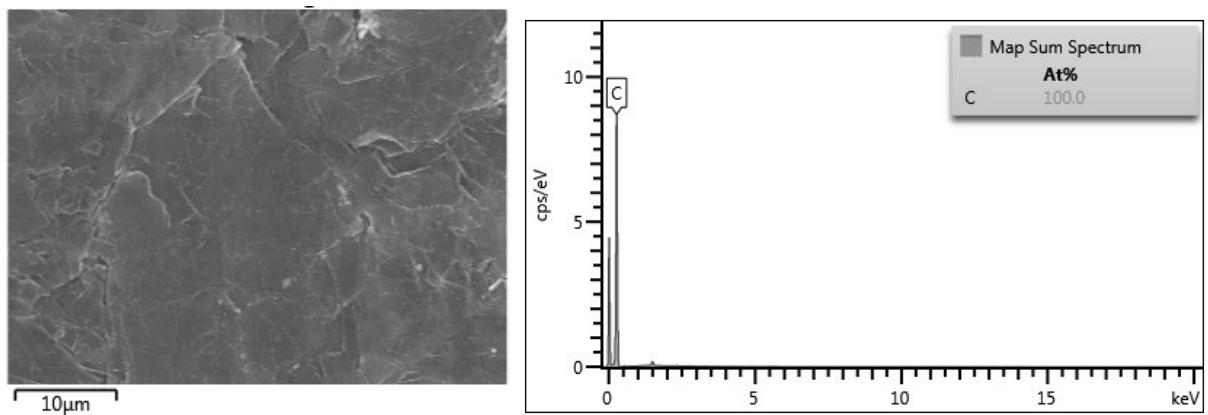

**Fig. S7.** Microphotograph and EDS analysis data for graphite (anode) surface.

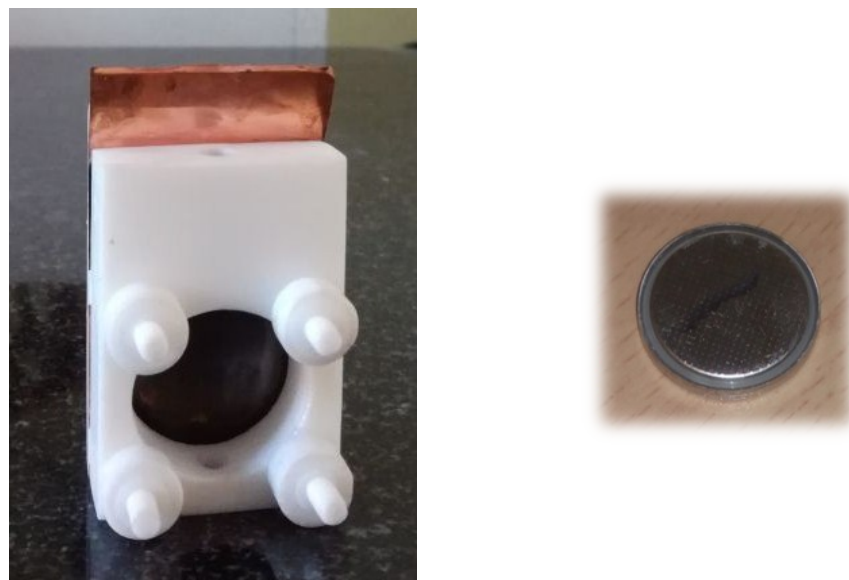

**Fig. S8.** (left) Electrolytic cell design. The anode wall is removed to show the electrolyte compartment and copper foil cathode coated with germanium nanoparticles after electrolysis. (right) Sample of fabricated half cell.
